# Supplementary material
Source: Springer Nature journal article supplement (https://www.springermedizin.de/resource/supplementary/12885_2010_2731_MOESM3_ESM.pdf/9461890)

# SNU-638

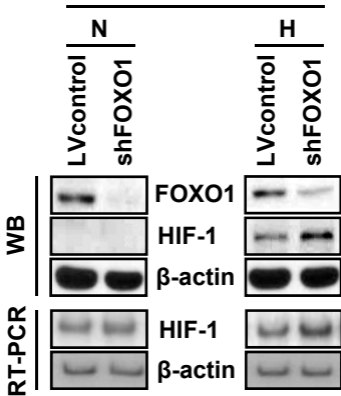

Supplement: MOESM3 [file 9461890]
